# Supplementary material for: Lipid Transfer Proteins (LTPs)—Structure, Diversity and Roles beyond Antimicrobial Activity
Source: MDPI journal article supplement (doi:10.3390/antibiotics10111281), 2021-10-21
Supplement: s1 [file s1]

**Table S1.** Patents regarding nsLTPs (non-specific lipid-transfer protein) deposited in the US Patent and Trademark Office (USPTO) \*.

| Accession Number | Deposit Date    | Description                                                                                                                                                                                                                                                                                                                                                                                                                                                                                            | Application                          |
|------------------|-----------------|--------------------------------------------------------------------------------------------------------------------------------------------------------------------------------------------------------------------------------------------------------------------------------------------------------------------------------------------------------------------------------------------------------------------------------------------------------------------------------------------------------|--------------------------------------|
| 5,585,235        | December, 1999  | Fluorescent method for measuring the activity of CETP or Microsomal Transfer Protein (MTP) and a device that determines the activity of CETP or MTP by the use of a newly synthesized donor particle without regard to the presence of colored or otherwise interfering factors. More particularly, includes a synthetic particle for determination of neutral LTP (CETP or MTP) activity with provisions to correct for interference that would normally occur during the measurement of the activity | Medicine and Pharmaceutical industry |
| 6,448,295        | September, 2002 | Substituted polycyclic aryl and heteroaryl tertiary-heteroalkylamine compounds useful as inhibitors of CETP; LTP-I, and compounds, compositions and methods for treating cardiovascular diseases. Preferred tertiary-heteroalkylamine compounds are substituted for *N-fused-phenyl-N-benzyl aminoalcohols                                                                                                                                                                                             | Medicine and Pharmaceutical industry |
| 6,451,823        | September, 2002 | Substituted polycyclic aryl and heteroaryl tertiary-heteroalkylamine compounds useful as inhibitors of CETP; LTP-I, and compounds, compositions and methods for treating cardiovascular diseases. Preferred tertiary-heteroalkylamine compounds are substituted for N-phenoxy-N-phenyl aminoalcohols                                                                                                                                                                                                   | Medicine and Pharmaceutical industry |
| 6,451,830        | September, 2002 | Substituted polycyclic aryl and heteroaryl tertiary-heteroalkylamine compounds useful as inhibitors of CETP; LTP-I, and compounds, compositions and methods for treating cardiovascular diseases. Preferred tertiary-heteroalkylamine compounds are substituted for N,N-disubstituted non-fused heterocyclo amines                                                                                                                                                                                     | Medicine and Pharmaceutical industry |
| 6,455,519        | September, 2002 | Substituted polycyclic aryl and heteroaryl tertiary-heteroalkylamine compounds useful as inhibitors of CETP; LTP-I, and compounds, compositions and methods for treating cardiovascular diseases. Preferred tertiary-heteroalkylamine compounds are substituted for N,N-disubstituted fused-heterocyclo amines                                                                                                                                                                                         | Medicine and Pharmaceutical industry |
| 6,458,803        | October,2002    | Substituted polycyclic aryl and heteroaryl tertiary-heteroalkylamine compounds useful as inhibitors of CETP; LTP-I, and compounds, compositions and methods for treating cardiovascular diseases. Preferred tertiary-heteroalkylamine compounds are substituted for N-phenyl-N-heteroaralkyl aminoalcohols                                                                                                                                                                                             | Medicine and Pharmaceutical industry |
| 6,458,849        | October, 2002   | Substituted polycyclic aryl and heteroaryl tertiary-heteroalkylamine compounds useful as inhibitors of CETP; LTP-I and compounds, compositions and methods for treating cardiovascular diseases. Preferred tertiary-heteroalkylamine compounds are substituted for N,N-disubstituted mercapto amines                                                                                                                                                                                                   | Medicine and Pharmaceutical industry |
| 6,458,852        | October, 2002   | Substituted polycyclic aryl and heteroaryl tertiary-heteroalkylamine compounds useful as inhibitors of CETP; plasma LTP-I and compounds, compositions and methods for treating cardiovascular diseases. Preferred tertiary-heteroalkylamine compounds are substituted for N,N-bis-phenyl aminoalcohols                                                                                                                                                                                                 | Medicine and Pharmaceutical industry |
| 6,462,092        | October,2002    | Substituted polycyclic aryl and heteroaryl tertiary-heteroalkylamine compounds useful as inhibitors of CETP; plasma LTP-I, and compounds, compositions and methods for treating cardiovascular diseases. Preferred tertiary-heteroalkylamine compounds are substituted for N,N-disubstituted reverse aminoalcohols                                                                                                                                                                                     | Medicine and Pharmaceutical industry |

|           |                |                                                                                                                                                                                                                                                                                                                                                               |                                      |
|-----------|----------------|---------------------------------------------------------------------------------------------------------------------------------------------------------------------------------------------------------------------------------------------------------------------------------------------------------------------------------------------------------------|--------------------------------------|
| 6,476,057 | November, 2002 | Substituted polycyclic aryl and heteroaryl tertiary-heteroalkylamine compounds useful as inhibitors of CETP; plasma LTP-I, and compounds, compositions and methods for treating cardiovascular diseases. Preferred tertiary-heteroalkylamine compounds are substituted for N,N-disubstituted cycloalkyl aminoalcohols                                         | Medicine and Pharmaceutical industry |
| 6,476,057 | November, 2002 | Substituted polycyclic aryl and heteroaryl tertiary-heteroalkylamine compounds useful as inhibitors of CETP; plasma LTP-I, and compounds, compositions and methods for treating cardiovascular diseases. Preferred tertiary-heteroalkylamine compounds are substituted for N,N-disubstituted cycloalkyl aminoalcohols                                         | Medicine and Pharmaceutical industry |
| 6,476,075 | November, 2002 | Substituted polycyclic aryl and heteroaryl tertiary-heteroalkylamine compounds useful as inhibitors of CETP; plasma LTP-I, and compounds, compositions and methods for treating cardiovascular diseases. Preferred tertiary-heteroalkylamine compounds are substituted for N,N-bis-benzyl aminoalcohols                                                       | Medicine and Pharmaceutical industry |
| 6,479,552 | November, 2002 | Substituted polycyclic aryl and heteroaryl tertiary-heteroalkylamine compounds useful as inhibitors of CETP; plasma LTP-I, and compounds, compositions and methods for treating cardiovascular diseases. Preferred tertiary-heteroalkylamine compounds are substituted for N,N-disubstituted diamines                                                         | Medicine and Pharmaceutical industry |
| 6,482,862 | November, 2002 | Substituted aromatic polycyclic tertiary-heteroalkylamine compounds as inhibitors of CETP; plasma LTP-I, and compounds, compositions and methods for treating cardiovascular diseases. Preferred substituted aromatic polycyclic tertiary-heteroalkylamine compounds are substituted for N-benzyl-N-phenyl aminoalcohols                                      | Medicine and Pharmaceutical industry |
| 6,521,607 | February, 2003 | Substituted aryl and heteroaryl (R)-Chiral Halogenated 1-Substitutedamino-(n+1)-Alkanol compounds useful as inhibitors of CETP; plasma LTP-I, and compounds, compositions and methods for treating cardiovascular diseases. Preferred (R)-Chiral 1-Substitutedamino-(n+1)-Alkanol compounds are substituted for (R)-Chiral N-phenoxy N-phenyl aminoalcohols   | Medicine and Pharmaceutical industry |
| 6,544,974 | April, 2003    | Substituted aryl and heteroaryl (R)-Chiral Halogenated 1-Substitutedamino-(n+1)-Alkanol compounds useful as inhibitors of CETP; plasma LTP-I, and compounds, compositions and methods for treating cardiovascular diseases. Preferred (R)-Chiral 1-Substitutedamino-(n+1)-Alkanol compounds are substituted for (R)-Chiral fused heterocyclic amino compounds | Medicine and Pharmaceutical industry |
| 6,583,183 | June, 2003     | Substituted polycyclic aryl and heteroaryl tertiary-heteroalkylamine compounds useful as inhibitors of CETP; plasma LTP-I, and compounds, compositions and methods for treating cardiovascular diseases. Preferred tertiary-heteroalkylamine compounds are substituted for N-phenyl-N-fused-benzyl aminoalcohols                                              | Medicine and Pharmaceutical industry |
| 6,586,433 | July, 2003     | Substituted polycyclic aryl and heteroaryl tertiary-heteroalkylamine compounds useful as inhibitors of CETP; plasma LTP-I, and compounds, compositions and methods for treating cardiovascular diseases. Preferred tertiary-heteroalkylamine compounds are substituted for N-heteroaryl-N-phenyl aminoalcohols                                                | Medicine and Pharmaceutical industry |
| 6,677,341 | January, 2004  | Substituted aryl and heteroaryl (R)-Chiral Halogenated 1-Substitutedamino-(n+1)-Alkanol compounds useful as inhibitors of CETP; plasma LTP-I, and compounds, compositions and methods for treating cardiovascular diseases. Preferred (R)-Chiral 1-Substitutedamino-(n+1)-Alkanol compounds are substituted for (R)-Chiral heteroaryl aminoalcohols           | Medicine and Pharmaceutical industry |

|           |                |                                                                                                                                                                                                                                                                                                                                                          |                                      |
|-----------|----------------|----------------------------------------------------------------------------------------------------------------------------------------------------------------------------------------------------------------------------------------------------------------------------------------------------------------------------------------------------------|--------------------------------------|
| 6,677,353 | January, 2004  | Substituted polycyclic aryl and heteroaryl tertiary-heteroalkylamine compounds useful as inhibitors of CETP; plasma LTP-I, and compounds, compositions and methods for treating cardiovascular diseases. Preferred tertiary-heteroalkylamine compounds are substituted for N-phenyl-N-heteroalkyl aminoalcohols                                          | Medicine and Pharmaceutical industry |
| 6,677,375 | January,2004   | Substituted polycyclic aryl and heteroaryl tertiary-heteroalkylamine compounds useful as inhibitors of CETP; plasma LTP-I, and compounds, compositions and methods for treating cardiovascular diseases. Preferred tertiary-heteroalkylamine compounds are substituted for N,N-bis-benzyl aminoalcohols                                                  | Medicine and Pharmaceutical industry |
| 6,677,379 | January,2004   | Substituted polycyclic aryl and heteroaryl tertiary-heteroalkylamine compounds useful as inhibitors of CETP; plasma LTP-I, and compounds, compositions and methods for treating cardiovascular diseases. Preferred tertiary-heteroalkylamine compounds are substituted for N,N-disubstituted diamines                                                    | Medicine and Pharmaceutical industry |
| 6,677,380 | January,2004   | Substituted polycyclic aryl and heteroaryl tertiary-heteroalkylamine compounds useful as inhibitors of CETP; plasma LTP-I, and compounds, compositions and methods for treating cardiovascular diseases. Preferred tertiary-heteroalkylamine compounds are substituted for N,N-disubstituted mercapto amines                                             | Medicine and Pharmaceutical industry |
| 6,677,382 | January,2004   | Substituted polycyclic aryl and heteroaryl tertiary-heteroalkylamine compounds useful as inhibitors of CETP; plasma LTP-I, and compounds, compositions and methods for treating cardiovascular diseases. Preferred tertiary-heteroalkylamine compounds are substituted for N,N-bis-phenyl aminoalcohols                                                  | Medicine and Pharmaceutical industry |
| 6,683,099 | January,2004   | Substituted polycyclic aryl and heteroaryl tertiary-heteroalkylamine compounds useful as inhibitors of CETP; plasma LTP-I, and compounds, compositions and methods for treating cardiovascular diseases. Preferred tertiary-heteroalkylamine compounds are substituted for N,N-disubstituted cycloalkyl aminoalcohols                                    | Medicine and Pharmaceutical industry |
| 6,683,113 | January,2004   | Substituted aryl and heteroaryl (R)-Chiral Halogenated 1-Substitutedamino-(n+1)-Alkanol compounds useful as inhibitors of CETP; plasma LTP –I, and compounds, compositions and methods for treating cardiovascular diseases. Preferred (R)-Chiral 1-Substitutedamino-(n+1)-Alkanol compounds are substituted for (R)-Chiral N,N-bis-benzyl aminoalcohols | Medicine and Pharmaceutical industry |
| 6,696,435 | February, 2004 | Substituted polycyclic aryl and heteroaryl tertiary-heteroalkylamine compounds useful as inhibitors of CETP; plasma LTP-I, and compounds, compositions and methods for treating cardiovascular diseases. Preferred tertiary-heteroalkylamine compounds are substituted for N,N-disubstituted fused-heterocyclo amines                                    | Medicine and Pharmaceutical industry |
| 6,696,472 | February, 2004 | Substituted polycyclic aryl and heteroaryl tertiary-heteroalkylamine compounds useful as inhibitors of CETP; plasma LTP-I, and compounds, compositions and methods for treating cardiovascular diseases. Preferred tertiary-heteroalkylamine compounds are substituted for N-phenoxy-N-phenyl aminoalcohols                                              | Medicine and Pharmaceutical industry |
| 6,699,898 | March, 2004    | Substituted polycyclic aryl and heteroaryl tertiary-heteroalkylamine compounds useful as inhibitors of CETP; plasma LTP-I, and compounds, compositions and methods for treating cardiovascular diseases. Preferred tertiary-heteroalkylamine compounds are substituted for N,N-disubstituted non-fused heterocyclo amines                                | Medicine and Pharmaceutical industry |

|            |                 |                                                                                                                                                                                                                                                                                                                                                                                                |                                      |
|------------|-----------------|------------------------------------------------------------------------------------------------------------------------------------------------------------------------------------------------------------------------------------------------------------------------------------------------------------------------------------------------------------------------------------------------|--------------------------------------|
| 6,710,089  | March, 2004     | Substituted polycyclic aryl and heteroaryl tertiary-heteroalkylamine compounds useful as inhibitors of CETP; plasma LTP-I, and compounds, compositions and methods for treating cardiovascular diseases. Preferred tertiary-heteroalkylamine compounds are substituted for N-fused-phenyl-N-benzyl aminoalcohols                                                                               | Medicine and Pharmaceutical industry |
| 6,723,752  | April, 2004     | Substituted aryl and heteroaryl (R)-Chiral Halogenated 1-Substitutedamino-(n+1)-Alkanol compounds useful as inhibitors of CETP; plasma LTP-I, and compounds, compositions and methods for treating cardiovascular diseases. Preferred (R)-Chiral 1-Substitutedamino-(n+1)-Alkanol compounds are substituted for (R)-Chiral N-benzyl-N-phenyl aminoalcohols                                     | Medicine and Pharmaceutical industry |
| 6,723,753  | April, 2004     | Substituted polycyclic aryl and heteroaryl tertiary-heteroalkylamine compounds useful as inhibitors of CETP; plasma LTP-I, and compounds, compositions and methods for treating cardiovascular diseases. Preferred tertiary-heteroalkylamine compounds are substituted for N-benzyl-N-phenyl aminoalcohols                                                                                     | Medicine and Pharmaceutical industry |
| 6,765,023  | July, 2004      | Substituted polycyclic aryl and heteroaryl tertiary-heteroalkylamine compounds useful as inhibitors of CETP; plasma LTP-I, and compounds, compositions and methods for treating cardiovascular diseases. Preferred tertiary-heteroalkylamine compounds are substituted for N,N-disubstituted reverse aminoalcohols                                                                             | Medicine and Pharmaceutical industry |
| 6,787,570  | September, 2004 | Substituted N-Alkyl/Alkenyl/Cycloalkyl/Heterocycyl N-Aryl/Heteroaryl tertiary-Heteroalkylamine compounds useful as inhibitors of CETP; plasma LTP-I, and compounds, compositions and methods for treating cardiovascular diseases. Preferred tertiary-heteroalkylamine compounds are substituted for N-cycloalkyl N-benzyl aminoalcohols                                                       | Medicine and Pharmaceutical industry |
| 6,803,388  | October, 2004   | Substituted aryl and heteroaryl (R)-Chiral Halogenated 1-Substitutedamino-(n+1)-Alkanol for (R)-Chiral N,N-bis-phenyl aminoalcohols compound useful as inhibitors of CETP; plasma LTP-I, and compounds, compositions and methods for treating cardiovascular diseases. Preferred (R)-Chiral 1-Substitutedamino-(n+1)-Alkanol compounds are substituted (R)-Chiral N,N-bis-phenyl aminoalcohols | Medicine and Pharmaceutical industry |
| 6,861,561  | March, 2005     | Substituted aromatic polycyclic tertiary-heteroalkylamine compounds useful as inhibitors of CETP; plasma LTP-I, and compounds, compositions and methods for treating cardiovascular diseases                                                                                                                                                                                                   | Medicine and Pharmaceutical industry |
| 7,122,536  | October, 2006   | Substituted aryl and heteroaryl (R)-Chiral Halogenated 1-Substitutedamino-(n+1)-Alkanol compounds useful as inhibitors of CETP; plasma LTP-I, and compounds, compositions and methods for treating cardiovascular diseases                                                                                                                                                                     | Medicine and Pharmaceutical industry |
| 7,253,211  | August, 2007    | Substituted aryl and heteroaryl (R)-Chiral Halogenated 1-Substitutedamino-(n+1)-Alkanol compounds useful as inhibitors of CETP; plasma LTP-I, and compounds, compositions and methods for treating cardiovascular diseases                                                                                                                                                                     | Medicine and Pharmaceutical industry |
| 7,700,658  | April, 2010     | Substituted aryl and heteroaryl (R)-Chiral Halogenated 1-Substitutedamino-(n+1)-Alkanol compounds useful as inhibitors of Cholesteryl Ester Transfer Protein (CETP; plasma LTP-I) and compounds, compositions and methods for treating cardiovascular diseases                                                                                                                                 | Medicine and Pharmaceutical industry |
| 10,526,365 | January, 2020   | Method of making and a modified allergen having reduced allergenicity and preserved immunogenicity compared to corresponding native allergenic material. The raw allergenic material is selected from the group consisting of DP mites extract, Der p1, ovalbumin and LTP                                                                                                                      | Medicine and Pharmaceutical industry |

|           |                 |                                                                                                                                                                                                                                                                                                                                                                                                                                                                                                                                          |                                               |
|-----------|-----------------|------------------------------------------------------------------------------------------------------------------------------------------------------------------------------------------------------------------------------------------------------------------------------------------------------------------------------------------------------------------------------------------------------------------------------------------------------------------------------------------------------------------------------------------|-----------------------------------------------|
| 5,525,716 | June, 1996      | <i>In vivo</i> expression in the aleurone cells of a cereal of a conjugate. The conjugate comprises a gene of interest and a LTP2 gene promoter. The conjugate is stably integrated within the cereal's genomic DNA                                                                                                                                                                                                                                                                                                                      | Plant breeding or biotechnological inferences |
| 5,792,933 | August, 1998    | Cotton fiber-specific LTP its amino acid sequence, its protein-encoding DNA sequence, and its 5' flanking sequence. In addition, the promoter and upstream sequences of two other LTP. Finally, methods for utilizing these sequences to express genes of interest in <i>Gossypium hirsutum</i> L., in a fiber-specific fashion                                                                                                                                                                                                          | Plant breeding or biotechnological inferences |
| 5,914,270 | June, 1999      | Method for promoting differentiation of cells in culture. At least LTP or LTP analog is introduced into a culture medium at a concentration that is effective for obtaining differentiation of cells in the culture medium                                                                                                                                                                                                                                                                                                               | Plant breeding or biotechnological inferences |
| 6,031,152 | February, 2000  | An expression system for at least the aleurone cells of a developing caryopsis or for at least the scutellar epithelial tissue or vascular tissue of a germinating seedling or developing grain or plant. The expression system comprises a gene promoter fused to a GOI. In a preferred embodiment the expression system comprises the GOI fused to a modified LTP1 promoter                                                                                                                                                            | Plant breeding or biotechnological inferences |
| 6,939,958 | September, 2005 | Regulatory region obtained from a wheat aleurone gene LTPW1. This region contains mutations or deletions of this regulatory region, useful to express heterologous genes of interest (GOI) within aleurone plant cells. Furthermore, a truncated LTPW1 regulatory region that exhibits constitutive activity with monocot and dicot plants and is also directed to vectors comprising these regulatory regions operatively linked with a heterologous GOI, as well as plant cell cultures and transgenic plants comprising these vectors | Plant breeding or biotechnological inferences |
| 7,417,179 | August, 2008    | Method for producing a plant having a modified epidermal outgrowth structure such as a trichome or root hair, comprising of transforming a plant or plant cell with a D-type cyclin gene operably linked to epidermis-preferred promoters (e.g., LTP3, GL2, GORK, MIP-MOD, BLEC4, WAXD9 and MtENOD12) and regenerating a plant from the transformed plant or plant cell                                                                                                                                                                  | Plant breeding or biotechnological inferences |
| 7,550,579 | June, 2009      | Novel nucleotide sequences for a pericarp-preferred promoter and terminator isolated from the maize LTP1 coding region and method for expressing a heterologous nucleotide sequence in a plant using the regulatory sequences                                                                                                                                                                                                                                                                                                            | Plant breeding or biotechnological inferences |
| 7,851,614 | December, 2010  | Novel nucleotide sequences for a pericarp-preferred promoter and terminator isolated from the maize LTP1 coding region and method for expressing a heterologous nucleotide sequence in a plant using the regulatory sequences                                                                                                                                                                                                                                                                                                            | Plant breeding or biotechnological inferences |
| 7,897,746 | March, 2011     | Novel nucleotide sequences for a pericarp-preferred promoter and terminator isolated from the maize LTP1 coding region and method for expressing a heterologous nucleotide sequence in a plant using the regulatory sequences                                                                                                                                                                                                                                                                                                            | Plant breeding or biotechnological inferences |
| 8,143,475 | March, 2012     | Promoters of a soybean LTP4 and fragments thereof and their use in promoting the expression of one or more heterologous nucleic acid fragments in plants                                                                                                                                                                                                                                                                                                                                                                                 | Plant breeding or biotechnological inferences |
| 8,158,858 | April, 2012     | Promoters of a soybean LTP1 and fragments thereof and their use in promoting the expression of one or more heterologous nucleic acid fragments in plants                                                                                                                                                                                                                                                                                                                                                                                 | Plant breeding or biotechnological inferences |
| 8,759,612 | June, 2014      | Gene expression regulatory sequences from soybean LTP2, fragments thereof, and their use in promoting the expression of one or more heterologous nucleic acid fragments in plants                                                                                                                                                                                                                                                                                                                                                        | Plant breeding or biotechnological inferences |

|            |                |                                                                                                                                                                                                                                                                                                                                                                                                               |                                               |
|------------|----------------|---------------------------------------------------------------------------------------------------------------------------------------------------------------------------------------------------------------------------------------------------------------------------------------------------------------------------------------------------------------------------------------------------------------|-----------------------------------------------|
| 8,859,746  | October, 2014  | Non-coding regulatory element polynucleotide molecules isolated from the LTP gene of <i>Oryza sativa</i> and useful for expressing transgenes in plants                                                                                                                                                                                                                                                       | Plant breeding or biotechnological inferences |
| 10,544,423 | January, 2020  | Recombinant fiber-selective promoter region comprising a DNA molecule comprising a fiber specificity region of a cotton Lipid Transfer Protein (LTP) gene promoter, operably linked to a specific DNA molecule and use thereof to increase fiber-selective expression of products of interest in cotton fiber                                                                                                 | Plant breeding or biotechnological inferences |
| 5,993,865  | November, 1999 | Beverage containing proteins and/or peptides and is characterized in that it contains Cereal-LT and/or homologues as herein defined and/or a modified Cereal-LTP fraction obtainable from the Cereal-LTP and/or homologues by heating, boiling and/or mashing the Cereal-LTP and/or homologues in water at a pH between 3 and 7. Additionally, a method for preparing it and a use of a foam-forming additive | Food industry                                 |
| 6,423,546  | July, 2002     | Novel monoclonal antibodies reactive with LTPs typically found in foaming beverages. More specifically, the present invention relates to novel monoclonal antibodies raised against the native and denatured forms of barley LTP1, and an assay for determining the content of said proteins in foaming beverages at various stages of their production                                                       | Food industry                                 |
| 5,324,821  | June, 1994     | Method of preparing a lipoprotein modified by incorporation of a lipophilic active substance as well as a pharmaceutical or cosmetic composition containing a lipoprotein modified and at least one LTP, in this way as an active ingredient                                                                                                                                                                  | Pharmaceutical or cosmetic industry           |

\* Patents identified from the search using the term "Lipid transfer protein" or "LTP" in the title or abstract.

Legend for abbreviations: Cholesteryl Ester Transfer Protein (CETP); Gene of interest (GOI); Lipid Transfer Protein (LTP); Microsomal Transfer Protein (MTP).
